# Supplementary material
Source: PubMed Central journal article supplement (PMC4310630)
Supplement: bi501016r_si_001.pdf [file bi501016r_si_001.pdf]

## **SUPPORTING INFORMATION**

Mutational analysis of the ability of resveratrol to inhibit amyloid formation by islet amyloid polypeptide: Critical evaluation of the importance of aromatic:inhibitor and histidine:inhibitor interactions

Ling-Hsien Tu, Lydia M. Young, Amy G. Wong, Alison. E. Ashcroft,  
Sheena E. Radford and Daniel P. Raleigh

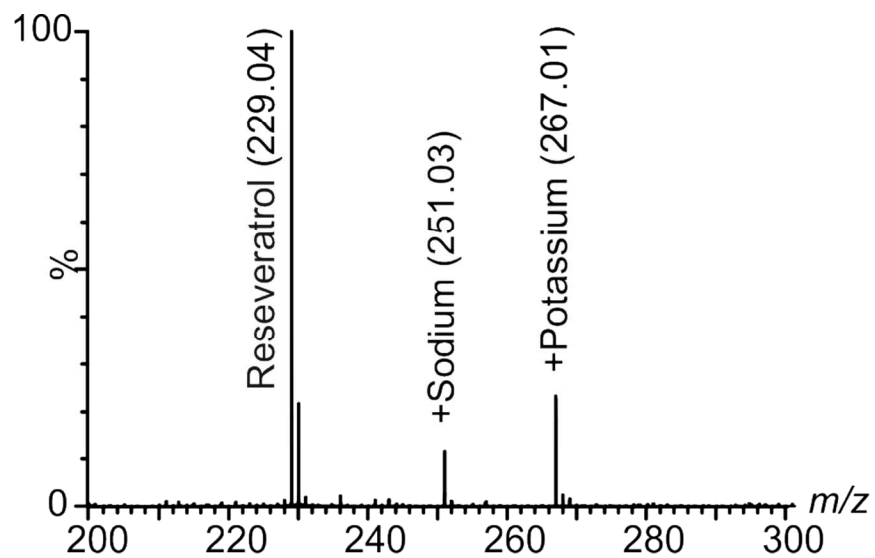

**Figure S1:** ESI-MS spectrum of a sample of 640  $\mu$ M resveratrol collected after 24 h incubation in 50:50 20 mM ammonium acetate:20 mM ammonium bicarbonate buffer, pH 7.4. The value of m/z, 229.04, corresponding to a molecular weight of 228.04 indicates that the compound has not degraded.

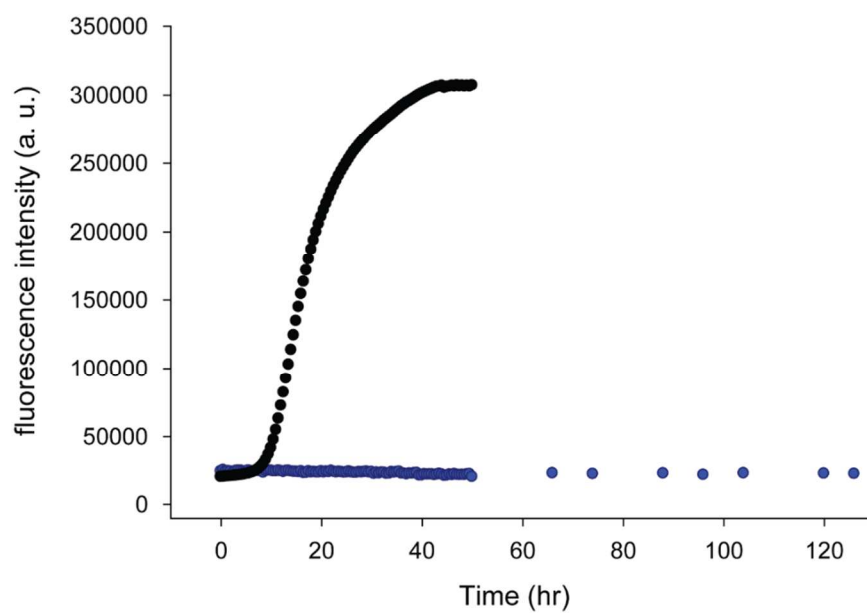

**Figure S2:** Thioflavin-T monitored kinetic experiments for wild-type IAPP (black) and wild-type IAPP in the presence of 20-fold molar excess of resveratrol (blue). Samples contained 16  $\mu\text{M}$  IAPP at pH 7.4, 20 mM Tris buffer with 1% (*v/v*) DMSO.

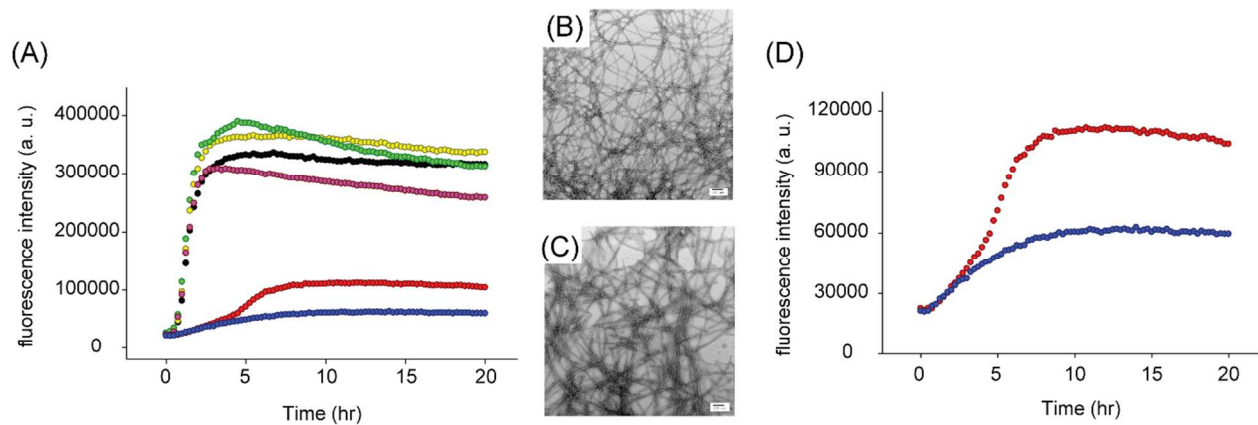

**Figure S3:** Resveratrol is not an effective inhibitor of amyloid formation by H18L-IAPP. (A) Thioflavin-T monitored kinetic experiments for H18L-IAPP, black; H18L-IAPP and resveratrol at a 1:1 ratio, yellow; at a 1:2 ratio, green; at a 1:5 ratio, pink; at a 1:10 ratio, red; at a 1:20 ratio, blue. (B) TEM image for H18L-IAPP and (C) for the 1:20 mixture of H18L-IAPP and resveratrol. Samples were collected for TEM at 22 h for H18L-IAPP with and without resveratrol. (D) An expansion of the data for H18L-IAPP with resveratrol at 1:10 and 1:20 molar ratios. Samples contained 16  $\mu$ M IAPP at pH 7.4, 20 mM Tris buffer with 1% (*v/v*) DMSO. Scale bars represent 100 nm.

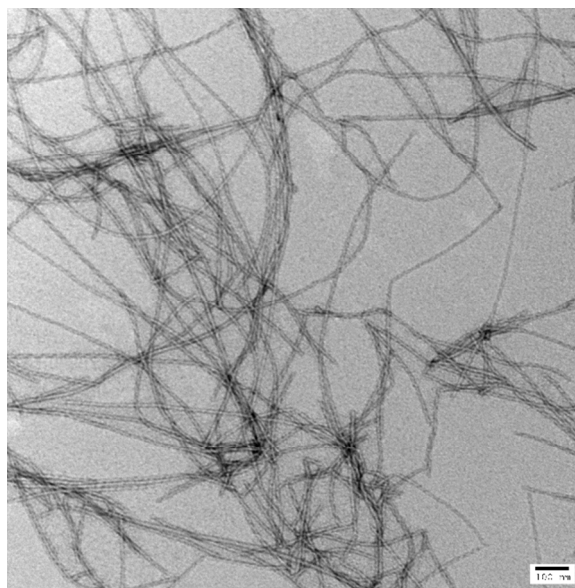

**Figure S4:** TEM image of F23L-IAPP fibrils with a 20-fold molar excess of resveratrol. Samples were removed from thioflavin-T kinetics experiments at 142 h. Scale bar represents 100 nm.

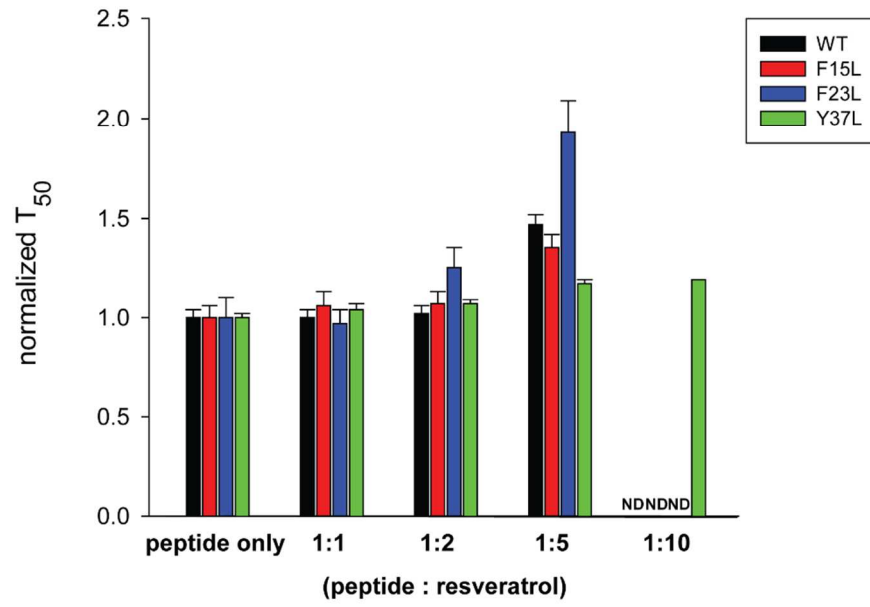

**Figure S5:** Comparison of the effect of different amounts of resveratrol on the  $t_{50}$  value for amyloid formation by wild-type IAPP (black), F15L-IAPP (red), F23L-IAPP (blue), and Y37L-IAPP (green). ND indicates could not be determined because of lack of any fluorescence signal. The error bars represent propagation of the uncertainty, generated from 2 or 3 independent studies. The Y axis is  $(t_{50} \text{ with resveratrol}) / (t_{50} \text{ no resveratrol})$ . ND= could not be determined because resveratrol interfered with the thioflavin-T assay.

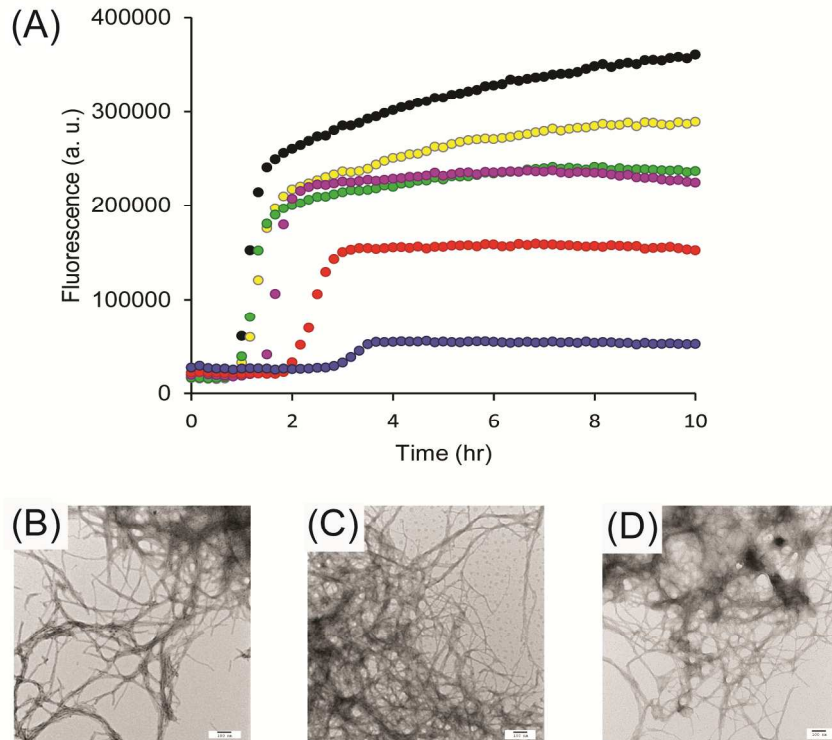

**Figure S6:** Resveratrol is not an effective inhibitor of amyloid formation by R11L-IAPP. (A) Thioflavin-T monitored kinetic experiments for R11L-IAPP, black; R11L-IAPP and resveratrol at a 1:1 ratio, yellow; at a 1:2 ratio, green; at a 1:5 ratio, pink; at a 1:10 ratio, red; at a 1:20 ratio, blue. (B) TEM image of the amyloid fibrils formed by R11L-IAPP. (C) TEM image of the 1:10 mixture of H18Q-IAPP and resveratrol. (D) TEM image for the 1:20 mixture of R11L-IAPP and resveratrol. Samples were collected for TEM at 4.5 h and contained 16  $\mu$ M IAPP in pH 7.4, 20 mM Tris buffer with 1% (v/v) DMSO. Scale bars represent 100 nm.
